# Supplementary material for: Effect of Lactobacillus acidophilus Fermented Broths Enriched with Eruca sativa Seed Extracts on Intestinal Barrier and Inflammation in a Co-Culture System of an Enterohemorrhagic Escherichia coli and Human Intestinal Cells
Source: PubMed Central journal article supplement (PMC7600469; doi:10.3390/nu12103064), 2020-10-07
Supplement: nutrients-12-03064-s001.pdf [file nutrients-12-03064-s001.pdf]

## Supplementary material

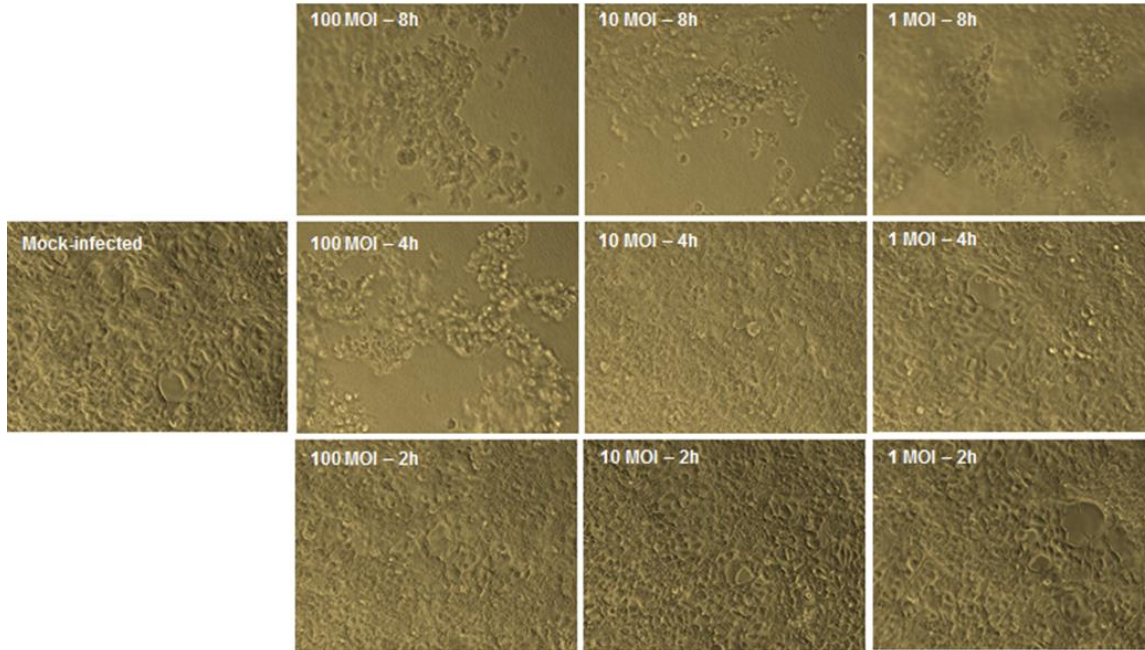

**Figure S1.** Time course (2-8 hours) of destruction of Caco-2 monolayer following EHEC infection at different MOI (100-1). Visual differences in cell monolayer integrity can be observed among the mock-infected control and cells at the different experimental conditions

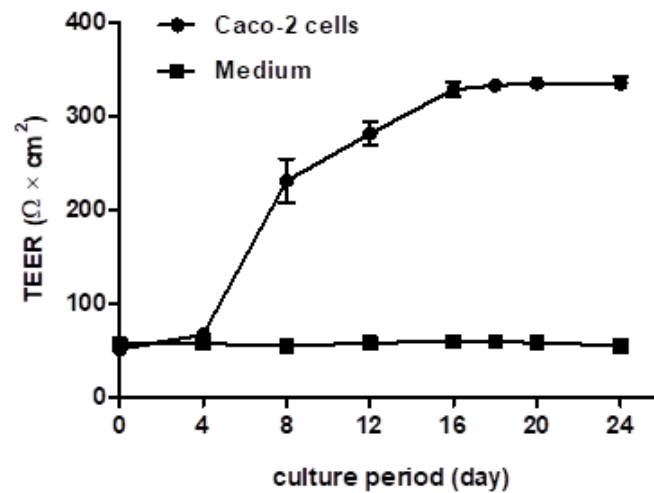

**Figure S2.** Optimization of Caco-2 cell culture in a Transwell system device. Cells (passages 30-35) were seeded on the Transwell membrane and TEER values were measured as a function of culture time; a continuous increase in TEER values was observed in the first 15 days thereafter reaching a plateau. Values were over  $250 \Omega \times \text{cm}^2$  that is considered as a threshold value for a standard polarized Caco-2 monolayer.

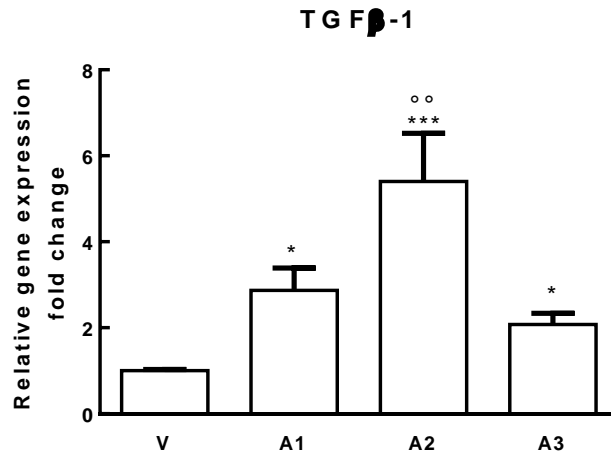

**Figure S3.** Relative TGFβ-1 gene expression in polarized Caco-2 cell monolayers treated for 24 hours with the broth solutions (or the vehicle, V, MRS broth) and infected with EHEC at 100 MOI for 2 h. A1, A2 and A3 (1:10 dilution) pretreatment significantly increase TGFβ-1 expression (\*\*\* P < 0.001; \* P < 0.05) in respect with cells treated with just EHEC; A2 with a greater effect compared with A1 and A3 (°° P < 0.01).

The following primers were used to perform Real-Time PCR: TGFβ-1 forward 5'-CAACTATTGCTTCAGCTCCACG -3' reverse 5'- AAGTTGGCATGGTAGCCCTT -3'; RPL13A forward 5'-CACCTGGAGGAGAAGAGGA-3', reverse 5'- CCGTAGCCTCATGAGCTGTT-3'. Changes in gene expression were calculated by the  $2^{-\Delta\Delta C_t}$  formula using RPL13A as reference gene. Data are the pool of three independent experiments.
